# Supplementary material for: Reproducibility of Her2/neu scoring in gastric cancer and assessment of the 10% cut-off rule
Source: PubMed Central journal article supplement (PMC4329007; doi:10.1002/cam4.365), 2014-12-16

**Supplemental Figure 1. A:** Screenshot of our virtual microscopy program in outline-tracing mode. The pathologists manually marked tumor tissue (blue) and positive tumor tissue (red). **B:** To test the ability of visually estimating area ratios, the pathologists were shown color-filled sketches of the regions they had outlined. These were only slightly tinted to avoid effects of color contrast or color perception. In a routine application one would not visually estimate the positive tumor ratios from drawn outlines because they could as well be computed; this only served to get an insight in the process of scoring.

**A**

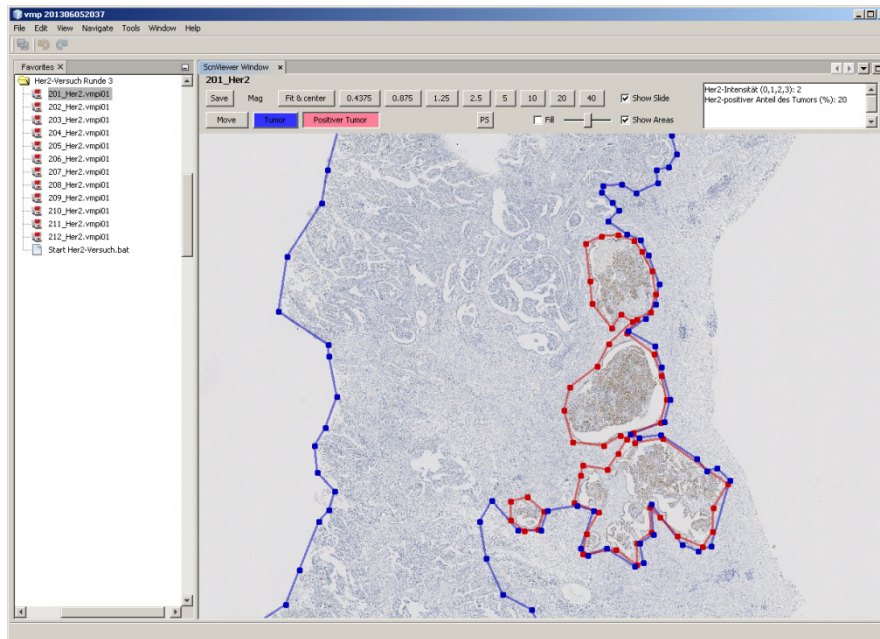

**B**

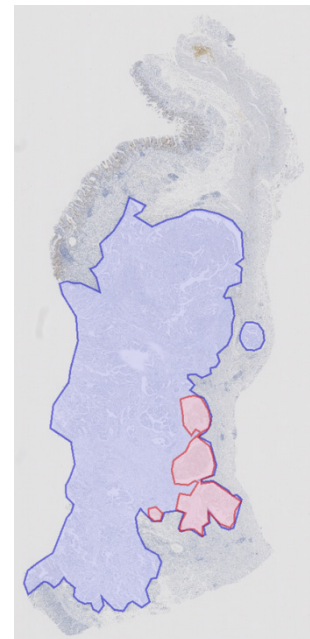

Supplement: cam40004-0235-sd1.pdf [file cam40004-0235-sd1.pdf]
