# Supplementary material for: Reproducibility of Her2/neu scoring in gastric cancer and assessment of the 10% cut-off rule
Source: PubMed Central journal article supplement (PMC4329007; doi:10.1002/cam4.365), 2014-12-16
Supplement: cam40004-0235-sd2.pdf [file cam40004-0235-sd2.pdf]

**Supplemental Figure 2.** Outlines manually drawn by the pathologists around areas of all tumor tissue (blue) and positive tumor tissue (red). Numbers below images denote the staining intensities from rating by microscope, by virtual microscopy, and by assisted virtual microscopy, respectively. Below are given the corresponding positive tumor ratios, plus the ratio that was calculated from the drawings. Continued on second page.

|                | Case #1                    | Case #2                     | Case #3                     | Case #4                     | Case #5                     | Case #6                     | Case #7                    | Case #8                     | Case #9                      | Case #10                    | Case #11                    | Case #12                   |
|----------------|----------------------------|-----------------------------|-----------------------------|-----------------------------|-----------------------------|-----------------------------|----------------------------|-----------------------------|------------------------------|-----------------------------|-----------------------------|----------------------------|
| Pathologist #1 | <br>2/2/2<br>20/8/15/8.71  | <br>2/3/3<br>40/25/70/60.28 | <br>3/3/3<br>20/25/20/22.35 | <br>2/1/2<br>50/60/70/69.94 | <br>3/3/3<br>70/80/80/78.95 | <br>3/2/3<br>30/20/60/74.41 | <br>2/2/2<br>30/8/8/4.87   | <br>1/1/1<br>15/15/12/6.13  | <br>2/2/2<br>50/70/75/78.54  | <br>3/3/3<br>60/40/45/35.70 | <br>2/3/2<br>15/12/30/18.84 | <br>2/1/2<br>5/70/8/4.22   |
| Pathologist #2 | <br>2/3/2<br>10/8/10/8.41  | <br>3/2/3<br>70/50/70/80.71 | <br>3/3/3<br>15/10/20/20.00 | <br>3/2/2<br>70/60/70/67.53 | <br>3/3/3<br>90/80/85/83.89 | <br>3/2/3<br>40/50/80/74.04 | <br>2/2/2<br>2/5/10/6.34   | <br>2/2/2<br>5/7/12/9.21    | <br>2/2/3<br>80/80/90/85.17  | <br>3/3/3<br>70/10/35/35.52 | <br>2/3/3<br>8/35/10/5.50   | <br>3/2/2<br>3/5/3/0.69    |
| Pathologist #3 | <br>1/2/1<br>10/10/10/9.25 | <br>2/2/2<br>40/15/70/59.76 | <br>3/3/3<br>20/10/10/17.53 | <br>2/2/2<br>40/15/60/61.76 | <br>3/3/3<br>90/60/70/65.29 | <br>2/2/2<br>30/40/60/66.94 | <br>1/1/1<br>5/5/5/5.27    | <br>1/1/1<br>1/5/10/8.61    | <br>1/2/2<br>20/60/90/77.69  | <br>3/3/3<br>80/30/40/37.52 | <br>2/2/2<br>30/10/10/17.73 | <br>2/1/1<br>1/10/15/18.14 |
| Pathologist #4 | <br>2/2/2<br>20/15/15/7.90 | <br>2/2/2<br>30/35/35/35.26 | <br>3/3/3<br>15/30/20/14.14 | <br>2/2/2<br>8/15/25/14.16  | <br>3/3/3<br>90/80/80/65.44 | <br>2/2/2<br>30/30/40/38.39 | <br>2/0/2<br>12/0/7/4.09   | <br>1/1/1<br>1/8/5/2.74     | <br>0/2/1<br>0/30/60/55.49   | <br>3/3/3<br>80/50/40/26.59 | <br>1/2/3<br>20/25/10/7.78  | <br>2/2/1<br>5/3/7/4.61    |
| Pathologist #5 | <br>2/2/2<br>15/15/15/7.73 | <br>2/2/2<br>25/35/75/63.15 | <br>3/3/3<br>25/30/20/16.49 | <br>1/1/2<br>20/60/70/47.42 | <br>3/3/3<br>85/75/75/73.91 | <br>2/2/2<br>60/35/75/71.32 | <br>1/1/1<br>15/5/10/10.62 | <br>1/1/1<br>10/20/20/15.25 | <br>1/1/2<br>15/60/100/99.68 | <br>2/3/3<br>70/60/25/26.74 | <br>2/2/2<br>50/25/20/16.13 | <br>2/2/1<br>5/5/45/33.90  |



|                 |                                                                                                               |                                                                                                                |                                                                                                                |                                                                                                              |                                                                                                                  |                                                                                                                  |                                                                                                                 |                                                                                                                 |                                                                                                                  |                                                                                                                  |                                                                                                                  |                                                                                                               |
|-----------------|---------------------------------------------------------------------------------------------------------------|----------------------------------------------------------------------------------------------------------------|----------------------------------------------------------------------------------------------------------------|--------------------------------------------------------------------------------------------------------------|------------------------------------------------------------------------------------------------------------------|------------------------------------------------------------------------------------------------------------------|-----------------------------------------------------------------------------------------------------------------|-----------------------------------------------------------------------------------------------------------------|------------------------------------------------------------------------------------------------------------------|------------------------------------------------------------------------------------------------------------------|------------------------------------------------------------------------------------------------------------------|---------------------------------------------------------------------------------------------------------------|
| Pathologist #6  | <br>2/2/2<br>10/10/14/8.42    | <br>2/3/3<br>30/30/20/10.44    | <br>3/3/3<br>10/25/25/19.61    | <br>3/2/2<br>1/70/60/68.75  | <br>3/3/3<br>80/75/80/79.22    | <br>2/2/2<br>20/30/20/19.90    | <br>2/2/2<br>3/ /8/6.35       | <br>1/2/2<br>1/1/2/0.37       | <br>1/2/1<br>30/40/65/70.02    | <br>3/3/3<br>20/50/40/34.32    | <br>2/3/2<br>10/30/20/22.24    | <br>3/3/2<br>1/ /2/1.02     |
| Pathologist #7  | <br>2/2/2<br>10/10/15/9.81   | <br>2/2/2<br>30/25/70/49.28   | <br>3/3/3<br>20/20/20/21.02   | <br>2/2/2<br>30/60/60/54.80 | <br>3/3/3<br>80/80/75/77.04   | <br>2/2/2<br>20/20/40/39.31   | <br>2/2/1<br>5/10/5/3.01     | <br>2/2/1<br>5/5/30/14.64    | <br>2/2/2<br>70/40/80/74.21   | <br>3/3/3<br>40/25/30/29.35   | <br>2/2/1<br>10/10/15/17.77   | <br>3/2/2<br>5/5/20/14.59  |
| Pathologist #8  | <br>2/3/2<br>12/12/8/7.69   | <br>2/3/3<br>35/30/30/23.08  | <br>3/3/3<br>10/20/30/21.19  | <br>1/3/2<br>65/5/80/73.84  | <br>3/3/3<br>70/70/75/78.65  | <br>2/2/2<br>30/30/80/74.67  | <br>2/2/2<br>8/25/7/5.76    | <br>2/2/1<br>8/15/12/10.63  | <br>1/0/2<br>60/0/85/86.47   | <br>3/3/3<br>65/35/30/35.46  | <br>2/2/1<br>10/8/8/9.69     | <br>2/1/2<br>5/60/3/0.87  |
| Pathologist #9  | <br>2/2/2<br>15/30/5/2.93  | <br>2/2/2<br>20/50/15/14.47 | <br>3/3/3<br>15/50/20/15.53 | <br>3/2/3<br>5/5/1/0.45   | <br>3/3/3<br>80/80/40/42.84 | <br>1/2/2<br>20/20/25/16.20 | <br>2/2/1<br>15/20/10/4.41 | <br>1/1/1<br>5/20/15/5.86  | <br>1/1/1<br>25/30/10/6.82  | <br>3/3/2<br>50/50/40/40.90 | <br>1/2/1<br>30/20/15/11.17 | <br>2/1/2<br>5/3/1/0.61  |
| Pathologist #10 | <br>2/2/2<br>20/20/13/8.35 | <br>2/2/3<br>25/40/40/33.85 | <br>3/3/3<br>25/25/25/20.15 | <br>3/2/3<br>5/3/8/8.06   | <br>3/3/3<br>75/75/75/71.92 | <br>2/2/3<br>60/50/40/44.46 | <br>2/2/3<br>15/10/12/5.19 | <br>2/1/2<br>20/10/15/2.68 | <br>2/2/2<br>60/60/60/68.38 | <br>3/3/3<br>60/25/45/38.75 | <br>2/2/3<br>30/25/33/29.14 | <br>2/2/2<br>5/10/7/0.85 |
