# Supplementary material for: Reproducibility of Her2/neu scoring in gastric cancer and assessment of the 10% cut-off rule
Source: PubMed Central journal article supplement (PMC4329007; doi:10.1002/cam4.365), 2014-12-16

**Supplemental Figure 4.** Illustration of 15% variability of intensity on a continuous gray scale at different levels. Each box spans 15% width of the gray scale. Viewing one box alone, the variation within is hardly noticeable.

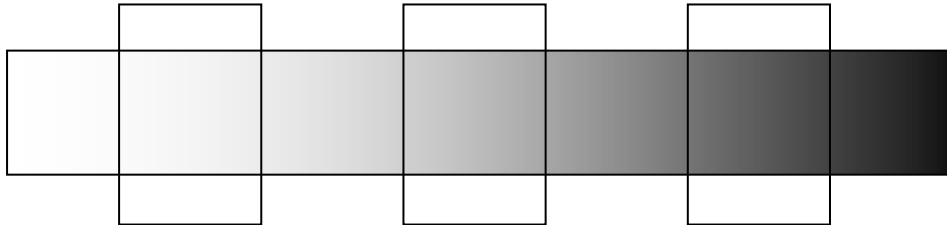

Supplement: cam40004-0235-sd4.pdf [file cam40004-0235-sd4.pdf]
