# Supplementary material for: Reproducibility of Her2/neu scoring in gastric cancer and assessment of the 10% cut-off rule
Source: PubMed Central journal article supplement (PMC4329007; doi:10.1002/cam4.365), 2014-12-16
Supplement: cam40004-0235-sd5.pdf [file cam40004-0235-sd5.pdf]

**Supplemental Table 1.** Clinical characteristics of the 12 cases of gastric cancer. UICC data (T, N, M, Stage) were recoded to 7<sup>th</sup> edition if only older data was available.

| Case No. | Gender | Age at diagnosis [years] | Localization     | Laurén type | T   | N   | M  | UICC Stage | Kiel Stage | Her2/neu IRS <sup>*)</sup> | Her2/neu SISH <sup>*)</sup> | Her2/neu Status <sup>*)</sup> |
|----------|--------|--------------------------|------------------|-------------|-----|-----|----|------------|------------|----------------------------|-----------------------------|-------------------------------|
| 1        | Male   | 77                       | Distal stomach   | Intestinal  | T2  | N1  | M0 | IIA        | IIIA       | 3+                         | positive                    | positive                      |
| 2        | Female | 75                       | Proximal stomach | Intestinal  | T2  | N0  | M0 | IB         | II         | 3+                         | positive                    | positive                      |
| 3        | Male   | 42                       | Proximal stomach | Intestinal  | T3  | N3  | M1 | IV         | IV         | 3+                         | positive                    | positive                      |
| 4        | Female | 85                       | Distal stomach   | Intestinal  | T1b | N0  | M0 | IA         | I          | 2+                         | negative                    | negative                      |
| 5        | Male   | 69                       | Distal stomach   | Intestinal  | T3  | N3a | M0 | IIIB       | IIIB       | 3+                         | positive                    | positive                      |
| 6        | Female | 78                       | Proximal stomach | Intestinal  | T4a | N3  | M1 | IV         | IV         | 3+                         | positive                    | positive                      |
| 7        | Male   | 66                       | Distal stomach   | Intestinal  | T2  | N0  | M0 | IB         | II         | 3+                         | positive                    | positive                      |
| 8        | Male   | 78                       | Distal stomach   | Mixed       | T4a | N2  | M0 | IIIB       | IIIB       | 0                          | negative                    | negative                      |
| 9        | Female | 68                       | Proximal stomach | Intestinal  | T2  | N0  | M0 | IB         | II         | 3+                         | positive                    | positive                      |
| 10       | Male   | 62                       | Proximal stomach | Intestinal  | T1b | N2  | M0 | IIA        | IIIB       | 3+                         | positive                    | positive                      |
| 11       | Female | 68                       | Distal stomach   | Diffuse     | T4a | N3a | M0 | IIIC       | IV         | 3+                         | positive                    | positive                      |
| 12       | Male   | 80                       | Distal stomach   | Intestinal  | T3  | N1  | M0 | IIB        | IIIA       | 0                          | negative                    | negative                      |

<sup>\*)</sup> Consensus Her2/neu results retrieved from the previous study<sup>14</sup>
