# Supplementary material for: Reproducibility of Her2/neu scoring in gastric cancer and assessment of the 10% cut-off rule
Source: PubMed Central journal article supplement (PMC4329007; doi:10.1002/cam4.365), 2014-12-16
Supplement: cam40004-0235-sd7.pdf [file cam40004-0235-sd7.pdf]

**Supplemental Table 3.** Subgroup analysis of inter-observer agreements between pathologists using one method of rating, respectively. Positive tumor ratios were compared using the mean of standard deviations, OCCC\*), and number of discordant ratings with respect to the 10% cutoff. Staining intensities were compared using Fleiss' kappa.

| Method                                                                                     | Board-certified pathologists (n=6) |                                         |                                                    | Residents (n=4)                   |                                         |                                                    | Agreement of staining intensity<br>Fleiss' kappa |                |
|--------------------------------------------------------------------------------------------|------------------------------------|-----------------------------------------|----------------------------------------------------|-----------------------------------|-----------------------------------------|----------------------------------------------------|--------------------------------------------------|----------------|
|                                                                                            | Agreement of positive tumor ratio  |                                         |                                                    | Agreement of positive tumor ratio |                                         |                                                    |                                                  |                |
|                                                                                            | OCCC*)                             | Mean of standard deviations [%] (range) | Number of specimens with 10% cut-off disagreements | OCCC*)                            | Mean of standard deviations [%] (range) | Number of specimens with 10% cut-off disagreements |                                                  |                |
| Microscope                                                                                 | 0.688                              | 11.4                                    | 4                                                  | 0.47 (p<0.001)                    | 0.723                                   | 12.2                                               | 4                                                | 0.36 (p<0.001) |
| Virtual microscopy                                                                         | 0.632                              | 11.8                                    | 5                                                  | 0.45 (p<0.001)                    | 0.466                                   | 14.2                                               | 7                                                | 0.37 (p<0.001) |
| Virtual microscopy with outlining assistance and visual estimation of positive tumor ratio | 0.574                              | 14.3                                    | 5                                                  | 0.51 (p<0.001)                    | 0.774                                   | 11.0                                               | 5                                                | 0.24 (p<0.001) |
| Virtual microscopy with outlining assistance and calculation of positive tumor ratio       | 0.600                              | 13.5                                    | 6                                                  |                                   | 0.799                                   | 9.5                                                | 4                                                |                |

\*) Overall concordance correlation coefficient
