# Supplementary material for: Reproducibility of Her2/neu scoring in gastric cancer and assessment of the 10% cut-off rule
Source: PubMed Central journal article supplement (PMC4329007; doi:10.1002/cam4.365), 2014-12-16
Supplement: cam40004-0235-sd8.pdf [file cam40004-0235-sd8.pdf]

**Supplemental Table 4.** Subgroup analysis of intra-observer agreements, comparing two rating methods, respectively. Agreements of positive tumor ratio were compared using OCCC, Pearson's correlation coefficient, and the number of discordant ratings with respect to the 10% cutoff. Agreements of staining intensities were calculated as kappa values.

| Methods compared                                                                  | Board-certified pathologists (n=6) |                                   |                         |                                 | Residents (n=4)                   |                                   |                         |                                 |
|-----------------------------------------------------------------------------------|------------------------------------|-----------------------------------|-------------------------|---------------------------------|-----------------------------------|-----------------------------------|-------------------------|---------------------------------|
|                                                                                   | Agreement of positive tumor ratio  |                                   |                         | Agreement of staining intensity | Agreement of positive tumor ratio |                                   |                         | Agreement of staining intensity |
|                                                                                   | OCCC                               | Pearson's correlation coefficient | Number of disagreements | Kappa                           | OCCC                              | Pearson's correlation coefficient | Number of disagreements | Kappa                           |
| Microscopy versus virtual microscopy                                              | 0.687                              | 0.698 (p<0.001)                   | 10                      | 0.548±0.086 (p<0.001)           | 0.605                             | 0.630 (p<0.001)                   | 10                      | 0.435±0.111 (p<0.001)           |
| Plain virtual microscopy versus virtual microscopy with area outlining assistance | 0.674                              | 0.682 (p<0.001)                   | 8                       | 0.568±0.084 (p<0.001)           | 0.587                             | 0.639 (p<0.001)                   | 10                      | 0.417±0.111 (p<0.001)           |
| Microscopy versus virtual microscopy with area outlining                          | 0.582                              | 0.603 (p<0.001)                   | 10                      | 0.592±0.083 (p<0.001)           | 0.760                             | 0.766 (p<0.001)                   | 8                       | 0.484±0.108 (p<0.001)           |
