# Supplementary material for: Reproducibility of Her2/neu scoring in gastric cancer and assessment of the 10% cut-off rule
Source: PubMed Central journal article supplement (PMC4329007; doi:10.1002/cam4.365), 2014-12-16
Supplement: cam40004-0235-sd9.pdf [file cam40004-0235-sd9.pdf]

**Supplemental Table 5.** Subgroup analysis of the numbers of false-negative ratings and cases, respectively, due to underestimation of positive tumor area and/or staining intensity. Numbers in parentheses denote the false-negative percentage related to the total number of ratings that were done in each subgroup on the 9 SISH-positive cases (72 ratings by 6 board-certified pathologists, and 48 ratings by 4 residents.)

|                                                                                                                     | Board-certified pathologists (n=6)                          |                    |                             | Residents (n=4)                                             |                    |                             |
|---------------------------------------------------------------------------------------------------------------------|-------------------------------------------------------------|--------------------|-----------------------------|-------------------------------------------------------------|--------------------|-----------------------------|
|                                                                                                                     | Number of false-negative ratings / number of cases affected |                    |                             | Number of false-negative ratings / number of cases affected |                    |                             |
|                                                                                                                     | Microscope                                                  | Virtual microscopy | Assisted virtual microscopy | Microscope                                                  | Virtual microscopy | Assisted virtual microscopy |
| False-negative because positive tumor ratio was underestimated (<10%), while IRS was 2+ or 3+ and SISH was positive | 2 (3%) / 1                                                  | 3 (4%) / 2         | 4 (6%) / 2                  | 4 (8%) / 2                                                  | 3 (6%) / 3         | 2 (4%) / 2                  |
| False-negative because IRS was underestimated (0 or 1+), while positive tumor ratio ≥10% and SISH positive          | 8 (11%) / 5                                                 | 2 (3%) / 1         | 6 (8%) / 3                  | 3 (6%) / 2                                                  | 0 / 0              | 1 (2%) / 1                  |
| Total false-negative rate because positive tumor ratio or IRS or both were underestimated, while SISH was positive  | 10 (14%) / 4                                                | 7 (10%) / 3        | 11 (15%) / 4                | 7 (15%) / 4                                                 | 5 (10%) / 4        | 5 (10%) / 3                 |
